# Supplementary material
Source: publisher figshare collection journal article supplement (https://acs.figshare.com/ndownloader/files/28159363)
Supplement: Supplementary file 1 [file 28159363]

Supporting Information

# Facile Fabrication of Composite Ag/Fe<sub>3</sub>O<sub>4</sub> and Porous Fe<sub>3</sub>O<sub>4</sub> Nanorods Based on Oblique Angle Co-Deposition

*Weijie Huang<sup>§</sup>, Xibo Li<sup>§</sup>, Bin Ai,<sup>\*,†‡</sup> and Yiping Zhao<sup>§</sup>*

<sup>§</sup>Department of Physics and Astronomy, University of Georgia, Athens, Georgia 30602, USA

<sup>†</sup>School of Microelectronics and Communication Engineering, Chongqing University,

Chongqing 400044, P.R. China

<sup>‡</sup>Chongqing Key Laboratory of Bio perception & Intelligent Information Processing,

Chongqing 400044, P.R. China

E-mail: [binai@cqu.edu.cn](mailto:binai@cqu.edu.cn)

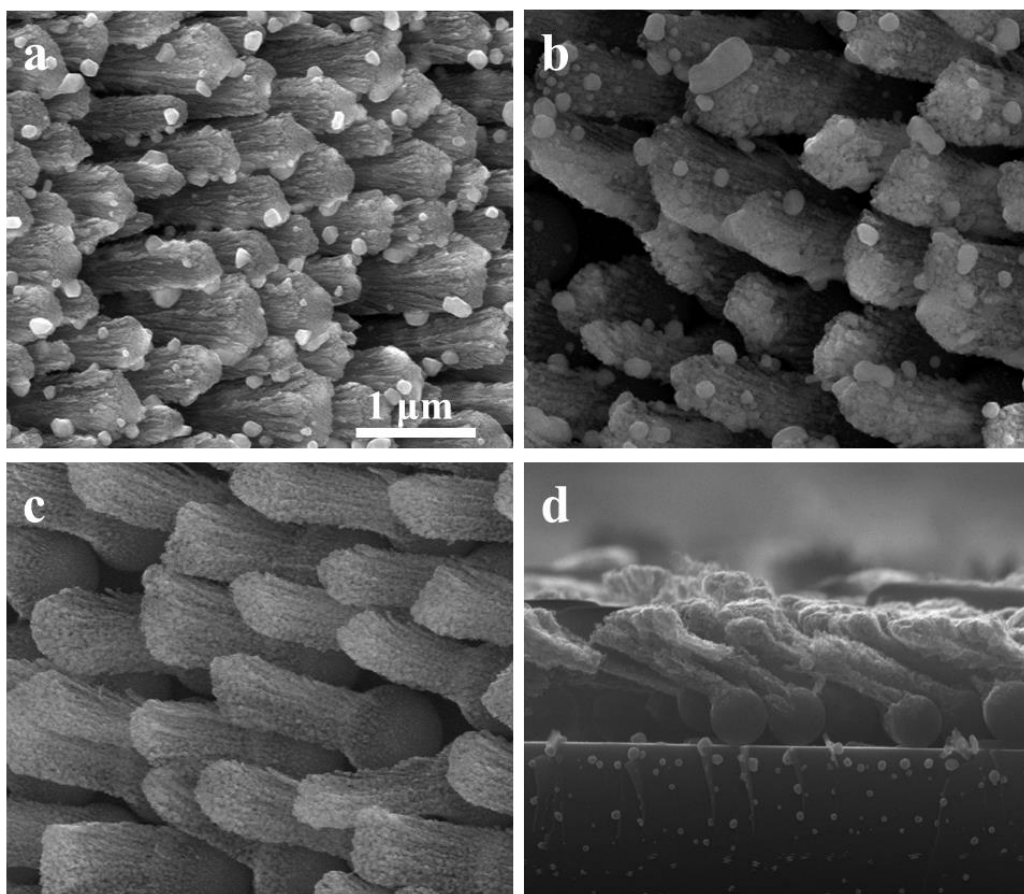

**Figure S1.** SEM images of the (a) as-deposited, (b) composite Ag/Fe<sub>3</sub>O<sub>4</sub>, and (c) porous Fe<sub>3</sub>O<sub>4</sub> nanorods. The diameter of the SiO<sub>2</sub> nanospheres used for the deposition was 800 nm. (d) Lateral SEM image of the porous Fe<sub>3</sub>O<sub>4</sub> nanorods. The ratio of deposition rate of Ag and Fe<sub>3</sub>O<sub>4</sub> was 1:1. The scale bar was 1 μm and applied to all the images.

When the SiO<sub>2</sub> nanospheres with the diameter of 800 nm were used (**Figure S1a-c**),  $L$  was still  $\sim 1.4$  μm, while  $D$  became  $\sim 600$  nm.  $D$  can be varied by using SiO<sub>2</sub> nanospheres with different diameter.

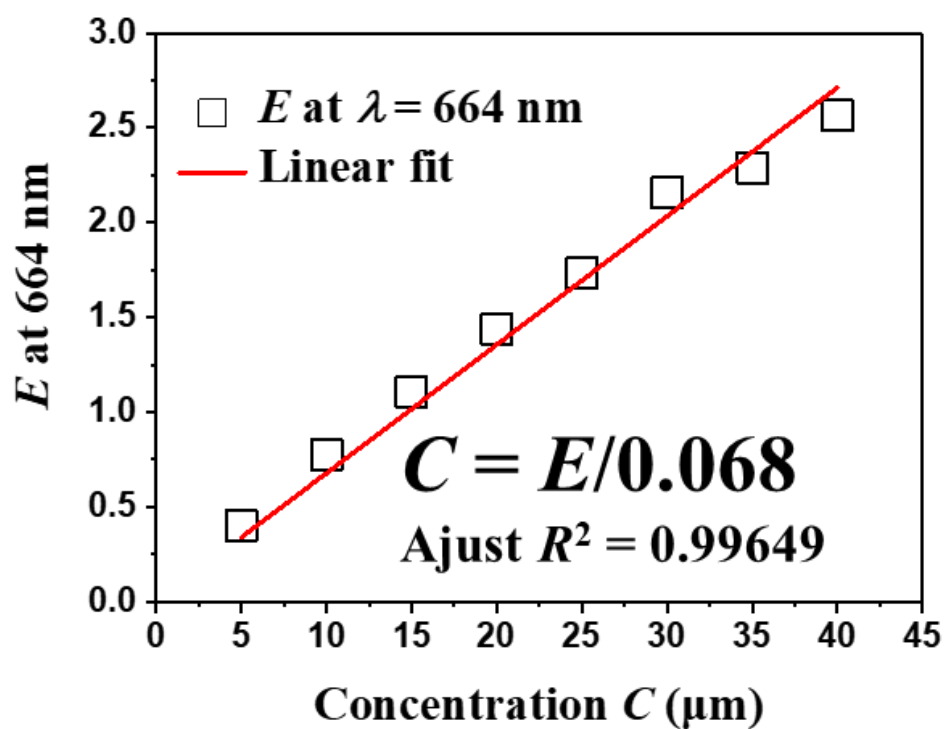

**Figure S2.** Calibration curve obtained from UV-Vis extinction spectra of MB aqueous solution with known concentrations using  $E$  at  $\lambda = 664$  nm. The linear fit of  $C = E/0.068$  was obtained. The adjust  $R^2$  was 0.99649.
